# Supplementary material for: Confirming Multiplex RT-qPCR Use in COVID-19 with Next-Generation Sequencing: Strategies for Epidemiological Advantage
Source: Hindawi journal article supplement (doi:10.1155/2022/2270965), 2022-07-30
Supplement: f1 [file 2270965.f1.pdf]

**Table-S1: Comparative analysis of existing SARS CoV-2 variant detection using the Next Generation Sequencing and qRT-PCR based approaches**

| Sr No | Lab ID  | Evaluation of Q-PCR based SARS-CoV-2 variant detection solutions |            |       |        |                          |          |       |       |       |                            |       |                            |              | PANGO Lineage | WHO Name     | Lineage Probability | Mean Coverage % |         |
|-------|---------|------------------------------------------------------------------|------------|-------|--------|--------------------------|----------|-------|-------|-------|----------------------------|-------|----------------------------|--------------|---------------|--------------|---------------------|-----------------|---------|
|       |         | Date of Collection                                               | County     | State | Postal | VOC Variant PCR (GT Mol) |          |       |       |       | Delta Variant PCR (GT Mol) |       | Delta Variant PCR (Thermo) |              |               |              |                     |                 |         |
|       |         |                                                                  |            |       |        | N501Y                    | Del69-70 | N501Y | E484K | K417N | K417T                      | L452R | T478K                      | L452R        |               |              |                     |                 | P681R   |
| 1     | ab40213 | 2021-07-30                                                       | SMITH      | TX    | 75709  | Neg                      | Neg      | Neg   | Neg   | Neg   | Neg                        | 22.72 | 33.27                      | 27.8         | 28.78         | B.1.617.2    | Delta               | 100.0%          | 22127.2 |
| 2     | 665426  | 2021-07-29                                                       | HOOD       | TX    | 76033  | Neg                      | Neg      | Neg   | 21.37 | Neg   | Neg                        | 18.69 | 25.39                      | 23.92        | 25.52         | B.1.617.2    | Delta               | 100.0%          | 37341.1 |
| 3     | ab40238 | 2021-07-30                                                       | SMITH      | TX    | 75762  | Neg                      | Neg      | Neg   | Neg   | Neg   | Neg                        | 27.27 | 32.32                      | 33.12        | <b>36.13</b>  | B.1.617.2.3  | Delta               | 100.0%          | 1809.3  |
| 4     | 665734  | 2021-07-29                                                       | BRAZOS     | TX    | 77802  | Neg                      | Neg      | Neg   | Neg   | Neg   | Neg                        | 19.75 | 25.36                      | 25.55        | 29.68         | B.1.617.2    | Delta               | 100.0%          | 35808.2 |
| 5     | 665448  | 2021-07-28                                                       | VAN ZANDT  | TX    | 75147  | Neg                      | Neg      | Neg   | Neg   | Neg   | Neg                        | 16.73 | 21.04                      | 21.93        | 26.9          | B.1.617.2.3  | Delta               | 100.0%          | 35788.0 |
| 6     | 666010  | 2021-07-30                                                       | JOHNSON    | TX    | 76093  | Neg                      | Neg      | Neg   | Neg   | Neg   | Neg                        | 24.91 | 29.75                      | 29.32        | 31.59         | B.1.617.2    | Delta               | 100.0%          | 47985   |
| 7     | 666044  | 2021-07-31                                                       | SMITH      | TX    | 75702  | Neg                      | Neg      | Neg   | Neg   | Neg   | Neg                        | 19.87 | 29.59                      | 25.88        | 29.93         | B.1.617.2.3  | Delta               | 100.0%          | 30345.7 |
| 8     | 664819  | 2021-07-28                                                       | SMITH      | TX    | 75702  | Neg                      | Neg      | Neg   | Neg   | Neg   | Neg                        | 25.76 | 31.83                      | 29.99        | 32.55         | B.1.617.2.3  | Delta               | 100.0%          | 15381.2 |
| 9     | 665664  | 2021-07-30                                                       | SMITH      | TX    | 75702  | Neg                      | Neg      | Neg   | Neg   | Neg   | Neg                        | 16.88 | 25.45                      | 22.25        | 27.06         | B.1.617.2.3  | Delta               | 100.0%          | 35543.9 |
| 10    | 665731  | 2021-07-29                                                       | WASHINGTON | TX    | 77833  | Neg                      | Neg      | Neg   | Neg   | Neg   | Neg                        | 19.62 | 25.41                      | 24.93        | 27.53         | B.1.617.2.3  | Delta               | 100.0%          | 35032.8 |
| 11    | 665743  | 2021-07-30                                                       | BRAZOS     | TX    | 77845  | Neg                      | Neg      | Neg   | Neg   | Neg   | Neg                        | 21.44 | 26.72                      | 26.64        | 31.39         | B.1.617.2    | Delta               | 100.0%          | 41262.8 |
| 12    | 665337  | 2021-07-29                                                       | SMITH      | TX    | 75702  | Neg                      | Neg      | Neg   | Neg   | Neg   | Neg                        | 24.84 | 29.92                      | 25.8         | 30.2          | B.1.617.2.3  | Delta               | 100.0%          | 49623.0 |
| 13    | 665333  | 2021-07-29                                                       | SMITH      | TX    | 75702  | Neg                      | Neg      | Neg   | Neg   | Neg   | Neg                        | 27.73 | 31.56                      | 34.9         | <b>37.08</b>  | B.1.617.2.3  | Delta               | 100.0%          | 23394.7 |
| 14    | 666007  | 2021-07-31                                                       | JOHNSON    | TX    | 76058  | Neg                      | Neg      | Neg   | Neg   | Neg   | Neg                        | 19.2  | 24.15                      | 23.8         | 26.32         | B.1.617.2    | Delta               | 100.0%          | 48201.1 |
| 15    | 666004  | 2021-07-31                                                       | HENDERSON  | TX    | 75763  | Neg                      | Neg      | Neg   | Neg   | Neg   | Neg                        | 24.89 | 30.3                       | 30.61        | 34.05         | B.1.617.2    | Delta               | 100.0%          | 6792.1  |
| 16    | 664792  | 2021-07-27                                                       | SMITH      | TX    | 75702  | Neg                      | Neg      | Neg   | Neg   | Neg   | Neg                        | 23.66 | 29.47                      | 27.99        | 30.58         | B.1.617.2.3  | Delta               | 100.0%          | 27506.0 |
| 17    | 665163  | 2021-07-28                                                       | TARRANT    | TX    | 76117  | Neg                      | Neg      | Neg   | Neg   | Neg   | Neg                        | 18.99 | 25.9                       | 22.73        | 25.21         | B.1.617.2    | Delta               | 100.0%          | 32888.9 |
| 18    | ab40199 | 2021-07-30                                                       | SMITH      | TX    | 75703  | Neg                      | Neg      | Neg   | Neg   | Neg   | Neg                        | 27.66 | 33                         | 32           | <b>36.83</b>  | B.1.617.2    | Delta               | 100.0%          | 6849.1  |
| 19    | ab40215 | 2021-07-30                                                       | SMITH      | TX    | 75707  | Neg                      | Neg      | Neg   | Neg   | Neg   | Neg                        | 18.9  | 23.48                      | 24.47        | 29.01         | B.1.617.2.3  | Delta               | 100.0%          | 49129.7 |
| 20    | 665432  | 2021-07-29                                                       | JOHNSON    | TX    | 76031  | Neg                      | Neg      | Neg   | Neg   | Neg   | Neg                        | 20.59 | 25.89                      | 25.39        | 29.81         | B.1.617.2    | Delta               | 100.0%          | 67119.2 |
| 21    | 665415  | 2021-07-29                                                       | HOOD       | TX    | 76049  | Neg                      | Neg      | Neg   | Neg   | Neg   | Neg                        | 22.45 | 28.26                      | 27.36        | 31.27         | B.1.617.2    | Delta               | 100.0%          | 40157.8 |
| 22    | 666010  | 2021-07-30                                                       | JOHNSON    | TX    | 76093  | Neg                      | Neg      | Neg   | Neg   | Neg   | Neg                        | 19.94 | 24.78                      | 24.24        | 28.9          | B.1.617.2    | Delta               | 100.0%          | 47985.0 |
| 23    | 664829  | 2021-07-28                                                       | SMITH      | TX    | 75702  | Neg                      | Neg      | Neg   | Neg   | Neg   | Neg                        | 24.99 | 28.93                      | 31.93        | 34.41         | B.1.617.2.3  | Delta               | 100.0%          | 22329.0 |
| 24    | 664875  | 2021-07-27                                                       | BRAZOS     | TX    | 77808  | Neg                      | Neg      | Neg   | Neg   | Neg   | Neg                        | 21    | 26.96                      | 24.93        | 27.52         | B.1.617.2    | Delta               | 100.0%          | 47290.6 |
| 25    | 665961  | 2021-07-30                                                       | BRAZOS     | TX    | 77845  | Neg                      | Neg      | Neg   | Neg   | Neg   | Neg                        | 19.24 | 27.88                      | 23.01        | 25.28         | B.1.617.2    | Delta               | 100.0%          | 33387.6 |
| 26    | ab40212 | 2021-07-30                                                       | SMITH      | TX    | 75762  | Neg                      | Neg      | Neg   | Neg   | Neg   | Neg                        | 29.39 | 34.02                      | 33.82        | <b>38.46</b>  | B.1.617.2    | Delta               | 100.0%          | 1288.2  |
| 27    | 665674  | 2021-07-30                                                       | SMITH      | TX    | 75702  | Neg                      | Neg      | Neg   | Neg   | Neg   | Neg                        | 23.03 | 27.33                      | 27.99        | 32.12         | B.1.617.2.3  | Delta               | 100.0%          | 57325.7 |
| 28    | 665670  | 2021-07-30                                                       | SMITH      | TX    | 75702  | Neg                      | Neg      | Neg   | Neg   | Neg   | Neg                        | 27.44 | 32.2                       | 32.8         | <b>35.94</b>  | B.1.617.2.3  | Delta               | 100.0%          | 10491.7 |
| 29    | ab40159 | 2021-07-30                                                       | SMITH      | TX    | 75703  | Neg                      | Neg      | Neg   | Neg   | Neg   | Neg                        | 24.2  | 30.53                      | 28.7         | 31.04         | B.1.617.2    | Delta               | 100.0%          | 43664.1 |
| 30    | 666013  | 2021-07-31                                                       | JOHNSON    | TX    | 76031  | Neg                      | Neg      | Neg   | Neg   | Neg   | Neg                        | 20.55 | <b>Neg</b>                 | 22.18        | 24.87         | B.1.617.2    | Delta               | 100.0%          | 69088.9 |
| 31    | 664812  | 2021-07-28                                                       | SMITH      | TX    | 75702  | Neg                      | Neg      | Neg   | Neg   | Neg   | Neg                        | 22.66 | 28.21                      | 26.75        | 31.78         | B.1.617.2.3  | Delta               | 100.0%          | 54609.4 |
| 32    | 664822  | 2021-07-28                                                       | SMITH      | TX    | 75702  | Neg                      | Neg      | Neg   | Neg   | Neg   | Neg                        | 30.32 | <b>37.99</b>               | 33.49        | <b>35.72</b>  | B.1.617.2.3  | Delta               | 100.0%          | 2860.5  |
| 33    | 665205  | 2021-07-29                                                       | HIDALGO    | TX    | 78574  | Neg                      | Neg      | Neg   | Neg   | Neg   | Neg                        | 17.73 | 21.9                       | 20.34        | 23.49         | B.1.617.2    | Delta               | 100.0%          | 35647.4 |
| 34    | 665660  | 2021-07-30                                                       | SMITH      | TX    | 75702  | Neg                      | Neg      | Neg   | Neg   | Neg   | Neg                        | 20.18 | 24.98                      | 24.49        | 26.58         | B.1.617.2.3  | Delta               | 100.0%          | 54823.9 |
| 35    | 665341  | 2021-07-29                                                       | SMITH      | TX    | 75702  | Neg                      | Neg      | Neg   | Neg   | Neg   | Neg                        | 29.88 | <b>37</b>                  | 33.68        | <b>38.52</b>  | B.1.617.2.3  | Delta               | 100.0%          | 4566.0  |
| 36    | 665411  | 2021-07-28                                                       | HOOD       | TX    | 76048  | Neg                      | Neg      | Neg   | Neg   | Neg   | Neg                        | 28.31 | 29.74                      | 31.66        | 33.16         | B.1.617.2    | Delta               | 100.0%          | 61671.5 |
| 37    | 665880  | 2021-07-30                                                       | TARRANT    | TX    | 76137  | Neg                      | Neg      | Neg   | Neg   | Neg   | Neg                        | 19.67 | 25.7                       | 23.76        | 26.92         | B.1.617.2    | Delta               | 100.0%          | 71332.2 |
| 38    | 666039  | 2021-07-30                                                       | BRAZOS     | TX    | 77845  | Neg                      | Neg      | Neg   | Neg   | Neg   | Neg                        | 19.79 | 25.97                      | 24.64        | 26.98         | B.1.617.2.3  | Delta               | 100.0%          | 70771.4 |
| 39    | 664789  | 2021-07-27                                                       | SMITH      | TX    | 75702  | Neg                      | Neg      | Neg   | Neg   | Neg   | Neg                        | 31.81 | 32.6                       | 33.97        | 34.37         | B.1.617.2.3  | Delta               | 100.0%          | 341.6   |
| 40    | 665225  | 2021-07-28                                                       | SMITH      | TX    | 75757  | Neg                      | Neg      | Neg   | Neg   | Neg   | Neg                        | 25.48 | 31.19                      | 29.5         | 30.84         | B.1.617.2    | Delta               | 100.0%          | 57429.9 |
| 41    | 665678  | 2021-07-30                                                       | SMITH      | TX    | 75702  | Neg                      | Neg      | Neg   | Neg   | Neg   | Neg                        | 28.16 | 35.22                      | 33.16        | 34.78         | B.1.617.2.3  | Delta               | 100.0%          | 2096.2  |
| 42    | 665676  | 2021-07-30                                                       | SMITH      | TX    | 75702  | Neg                      | Neg      | Neg   | Neg   | Neg   | Neg                        | 20.85 | 25.19                      | 24.67        | 29.86         | B.1.617.2.3  | Delta               | 100.0%          | 33664.1 |
| 43    | 665588  | 2021-07-29                                                       | SMITH      | TX    | 75771  | Neg                      | Neg      | Neg   | Neg   | Neg   | Neg                        | 18.5  | <b>Neg</b>                 | 20.88        | 25.97         | B.1.617.2.25 | Delta               | 100.0%          | 77387.8 |
| 44    | 665667  | 2021-07-30                                                       | SMITH      | TX    | 75702  | Neg                      | Neg      | Neg   | Neg   | Neg   | Neg                        | 24.98 | 29.05                      | 29.91        | 33.41         | B.1.617.2.3  | Delta               | 100.0%          | 40148.8 |
| 45    | ab40145 | 2021-07-31                                                       | SMITH      | TX    | 75706  | Neg                      | Neg      | Neg   | Neg   | Neg   | Neg                        | 22.79 | 26.07                      | 26.67        | 30.51         | B.1.617.2    | Delta               | 100.0%          | 57736.7 |
| 46    | 666038  | 2021-07-31                                                       | SMITH      | TX    | 75702  | Neg                      | Neg      | Neg   | Neg   | Neg   | Neg                        | 33.65 | <b>Neg</b>                 | <b>38.28</b> | <b>39.97</b>  | B.1.617.2.3  | Delta               | 100.0%          | 3672.1  |
| 47    | 664813  | 2021-07-28                                                       | SMITH      | TX    | 75702  | Neg                      | Neg      | Neg   | Neg   | Neg   | Neg                        | 21.99 | 27.45                      | 26.14        | 28.88         | B.1.617.2.3  | Delta               | 100.0%          | 54978.4 |
| 48    | 665213  | 2021-07-29                                                       | TARRANT    | TX    | 76020  | Neg                      | Neg      | Neg   | Neg   | Neg   | Neg                        | 23.21 | 28.36                      | 27.35        | 28.35         | B.1.617.2    | Delta               | 100.0%          | 66473.2 |
| 49    | ab43432 | 2021-07-30                                                       | HARRISON   | TX    | 75670  | Neg                      | Neg      | Neg   | Neg   | Neg   | Neg                        | 25.17 | 31.64                      | 29.92        | 32.32         | B.1.617.2.3  | Delta               | 100.0%          | 11141.2 |
| 50    | 665659  | 2021-07-30                                                       | SMITH      | TX    | 75702  | Neg                      | Neg      | Neg   | Neg   | Neg   | Neg                        | 29.63 | 33.82                      | <b>35.52</b> | <b>38.89</b>  | B.1.617.2.3  | Delta               | 100.0%          | 1029.7  |
| 51    | 665476  | 2021-07-29                                                       | HARRIS     | TX    | 77041  | Neg                      | Neg      | Neg   | Neg   | Neg   | Neg                        | 29.8  | 33.99                      | <b>35.84</b> | <b>36.09</b>  | B.1.617.2    | Delta               | 100.0%          | 2425.0  |
| 52    | ab40209 | 2021-07-30                                                       | SMITH      | TX    | 75762  | Neg                      | Neg      | Neg   | Neg   | Neg   | Neg                        | 26.36 | 31.82                      | 31.14        | 32.68         | B.1.617.2    | Delta               | 100.0%          | 9087.8  |
| 53    | ab40131 | 2021-07-31                                                       | SMITH      | TX    | 75704  | Neg                      | Neg      | Neg   | Neg   | Neg   | Neg                        | 18.69 | 20.67                      | 27.79        | 28.14         | B.1.617.2    | Delta               | 100.0%          | 32246.6 |
| 54    | 666045  | 2021-07-31                                                       | SMITH      | TX    | 75702  | Neg                      | Neg      | Neg   | Neg   | Neg   | Neg                        | 18.33 | 23.89                      | 22.34        | 24.53         | B.1.617.2.3  | Delta               | 100.0%          | 36172.8 |
| 55    | 664778  | 2021-07-27                                                       | SMITH      | TX    | 75702  | Neg                      | Neg      | Neg   | Neg   | Neg   | Neg                        | 28.21 | 33.7                       | 33.89        | <b>35.81</b>  | B.1.617.2.3  | Delta               | 100.0%          | 2849.4  |
| 56    | 665032  | 2021-07-28                                                       | JOHNSON    | TX    | 76044  | Neg                      | Neg      | Neg   | Neg   | Neg   | Neg                        | 23.89 | 31.91                      | 25.66        | 27.8          | B.1.617.2.3  | Delta               | 100.0%          | 22923.6 |
| 57    | 665658  | 2021-07-30                                                       | SMITH      | TX    | 75702  | Neg                      | Neg      | Neg   | Neg   | Neg   | Neg                        | 19.42 | 25.04                      | 25.9         | 27.78         | B.1.617.2.3  | Delta               | 100.0%          | 29240.8 |
| 58    | 665340  | 2021-07-29                                                       | SMITH      | TX    | 75702  | Neg                      | Neg      | Neg   | Neg   | Neg   | Neg                        | 26.71 | 31.81                      | 30.25        | 32.2          | B.1.617.2.3  | Delta               | 100.0%          | 19843.7 |
| 59    | 665335  | 2021-07-29                                                       | SMITH      | TX    | 75702  | Neg                      | Neg      | Neg   | Neg   | Neg   | Neg                        | 26.29 | 29.67                      | 27.96        | 30.41         | B.1.617.2.3  | Delta               | 100.0%          | 36682.4 |
| 60    | 665602  | 2021-07-30                                                       | HENDERSON  | TX    | 75763  | Neg                      | Neg      | Neg   | Neg   | Neg   | Neg                        | 26.07 | 31.54                      | 32.17        | 32.65         | B.1.617.2    | Delta               | 100.0%          | 9208.1  |
| 61    | 665783  | 2021-07-30                                                       | SMITH      | TX    | 75701  | Neg                      | Neg      | Neg   | Neg   | Neg   | Neg                        | 19.99 | 24.98                      | 24.92        | 27.22         | B.1.617.2    | Delta               | 100.0%          | 29924.4 |
| 62    | 666043  | 2021-07-31                                                       | SMITH      | TX    | 75702  | Neg                      | Neg      | Neg   | Neg   | Neg   | Neg                        | 21.97 | 26.5                       | 27.87        | 29.29         | B.1.617.2.3  | Delta               | 100.0%          | 26266.6 |
| 63    | 664804  | 2021-07-28                                                       | SMITH      | TX    | 75702  | Neg                      | Neg      | Neg   | Neg   | Neg   | Neg                        | 23.84 | 31.64                      | 27.54        | 30.2          | B.1.617.2.3  | Delta               | 100.0%          | 24351.7 |
| 64    | 664807  | 2021-07-27                                                       | SMITH      | TX    | 75702  | Neg                      | Neg      | Neg   | Neg   | Neg   | Neg                        | 33.15 | <b>Neg</b>                 | <b>39.09</b> | <b>39.09</b>  | B.1.617.2.3  | Delta               | 100.0%          | 317.0   |
| 65    | PrcD 1  | Aug-20                                                           | SMITH      | TX    | 75703  | Neg                      | Neg      | Neg   | Neg   | Neg   | Neg                        | Neg   | Neg                        | Neg          | Neg           | B.1.243      | Non-VOC             | 100.0%          | 1340    |
| 66    | PrcD 2  | Aug-20                                                           | SMITH      | TX    | 75703  | Neg                      | Neg      | Neg   | Neg   | Neg   | Neg                        | Neg   | Neg                        | Neg          | Neg           | B.1.574      | Non-VOC             | 100.0%          | 2380    |
| 67    | PrcD 6  | Aug-20                                                           | SMITH      | TX    | 75703  | Neg                      | Neg      | Neg   | Neg   | Neg   | Neg                        | Neg   | Neg                        | Neg          | Neg           | B.1.574      | Non-VOC             | 100.0%          | 1276    |
| 68    | PrcD 7  | Aug-20                                                           |            |       |        |                          |          |       |       |       |                            |       |                            |              |               |              |                     |                 |         |
